# Supplementary material
Source: publisher site journal article supplement (https://www.spandidos-publications.com/1300/downloadSupplementary)

Figure S1. Transfection efficiency of plasmids and lentivirus. (A) Negative was without transfection. CX3CR1 overexpression lentivirus was transfected into MHCC97H to construct CX3CR1<sup>high</sup> MHCC97H. Negative lentivirus was transfected into MHCC97H to construct CX3CR1<sup>nor</sup> MHCC97H. (B) Left panels, negative was without transfection. BMECs transfected with CX3CL1 overexpression plasmid was as CX3CL1 OV. BMECs transfected with negative plasmid was as control. Right panels, negative was without transfection. BMECs transfected with CX3CL1 siRNA plasmid was as CX3CL1 si. BMECs transfected with siRNA-scramble plasmid was as control. (C) Left panels, negative was without transfection. BMECs transfected with ADAM17 overexpression plasmid was as ADAM17 OV. BMECs transfected with negative plasmid was as control. Right panels, negative was without transfection. BMECs transfected with ADAM17 siRNA plasmid was as ADAM17 si. BMECs transfected with siRNA-scramble plasmid was as control. (D) Negative was without transfection. CX3CL1 siRNA lentivirus was transfected into BMECs to construct CX3CL1<sup>low</sup> BMECs. The siRNA-scramble lentivirus was transfected into MHCC97H to construct CX3CL1<sup>nor</sup> BMECs. Western blot analysis data were analyzed using ANOVA followed by Tukey's test.

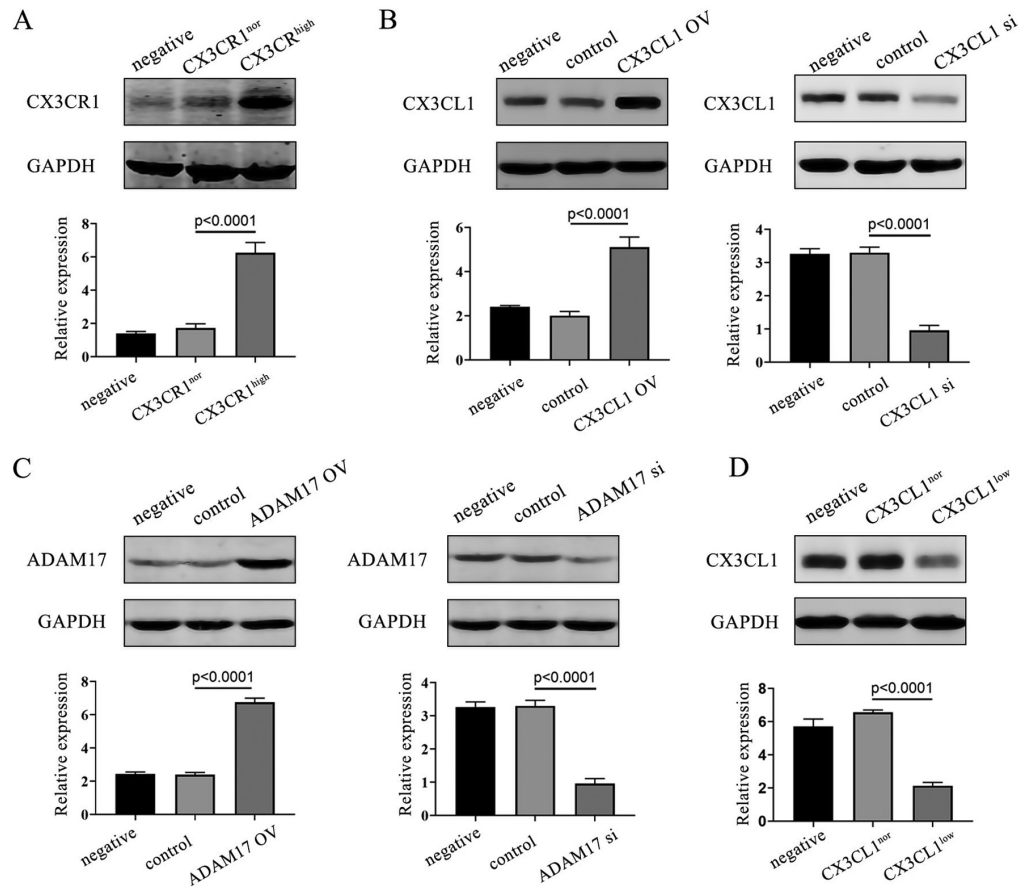

Supplement: Supplementary file 1 [file downloadSupplementary]
